# Supplementary material for: The role of shear dynamics in biofilm formation
Source: PubMed Central journal article supplement (PMC9055050; doi:10.1038/s41522-022-00300-4), 2022-04-29
Supplement: 41522_2022_300_MOESM2_ESM.pdf [file 41522_2022_300_MOESM2_ESM.pdf]

# 1      **The role of shear dynamics in biofilm formation.**

2      *Erifyli Tsagkari\*, Stephanie Connelly, Zhaowei Liu, Andrew McBride, and William T. Sloan*

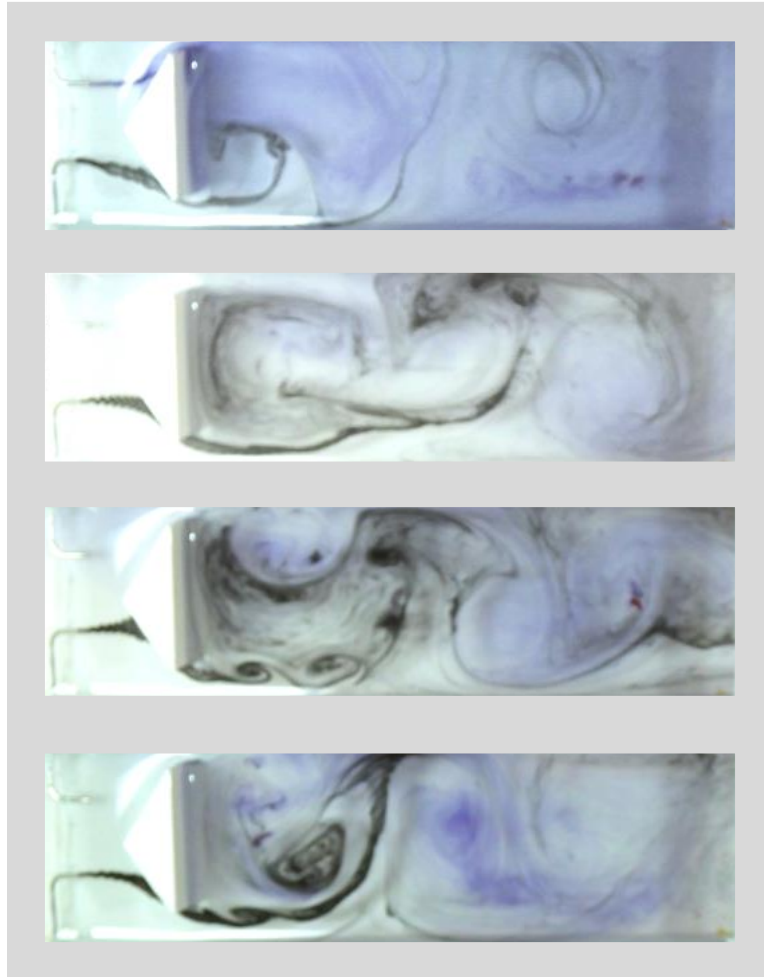

3

4      **Supplementary Figure 1.** Snap shots from the flow visulisation of LVF. They show vortices being shed  
5      by the object with alternate clockwise and anticlockwise rotation. The pattern is similar to that simulated  
6      by the CFD code.

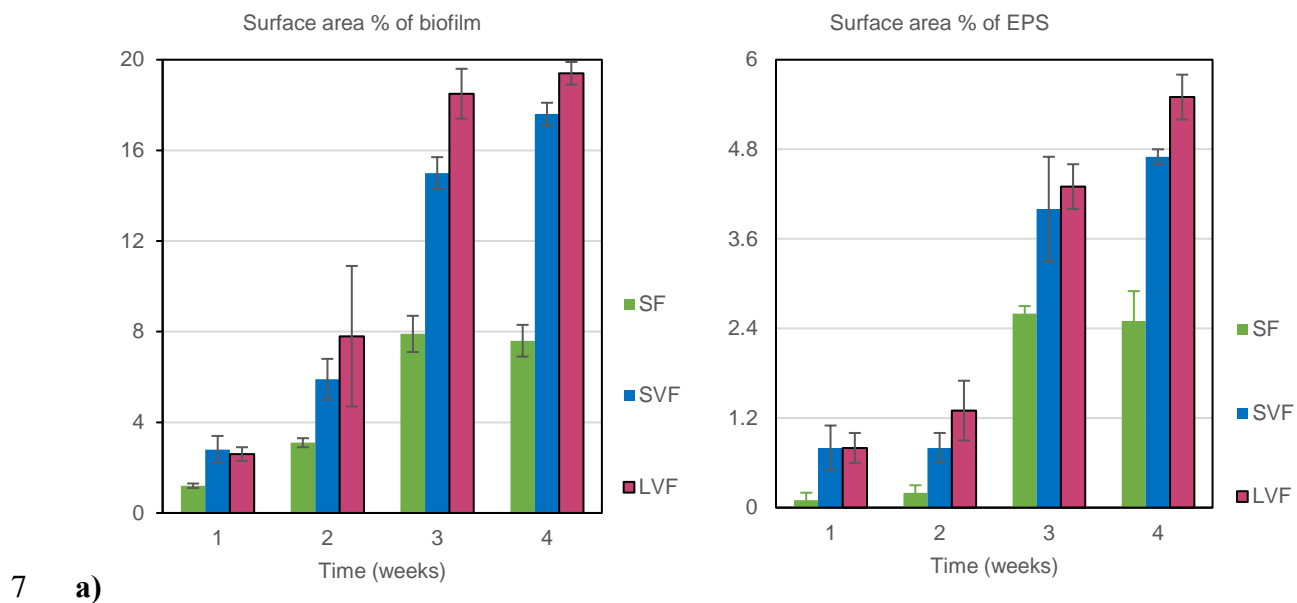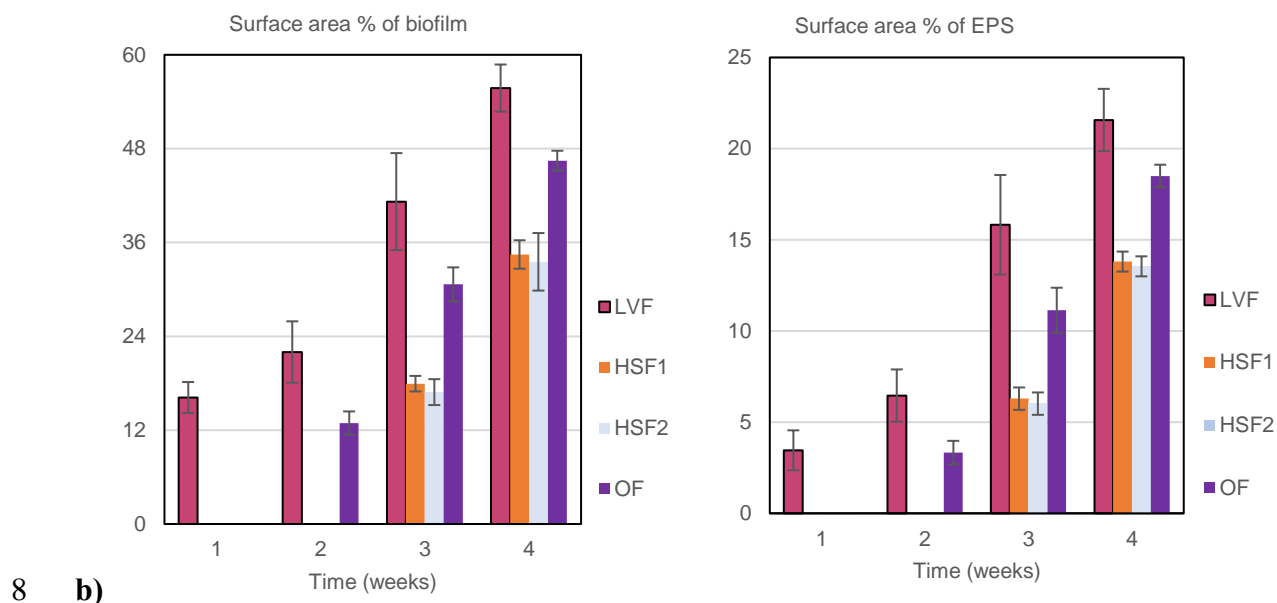

9 **Supplementary Figure 2.** Surface area % of the total biofilm (EPS + Cells) and of only the EPS for the  
 10 material in liquid samples from each of the effluent of **a)** first set of experiments and **b)** second set of  
 11 experiments. The error bars in the histogram represent +/- one standard deviation.

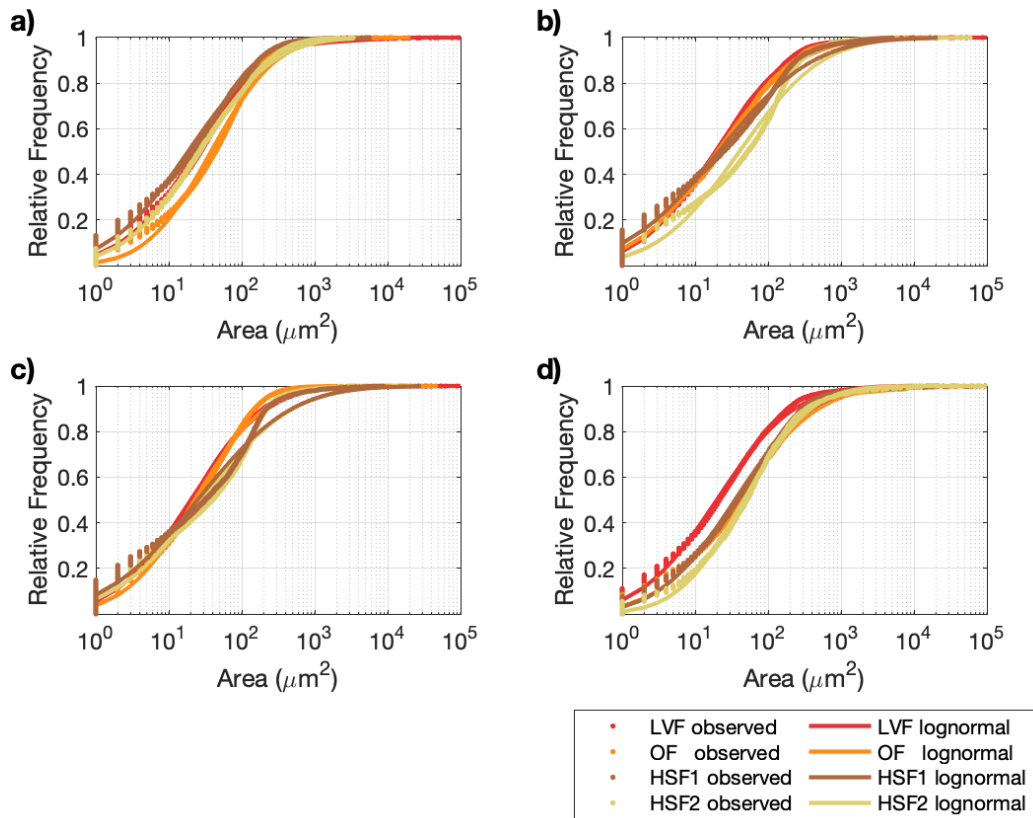

12

13 **Supplementary Figure 3.** Cumulative frequency distributions of the area covered by individual clumps  
 14 when imaged by a microscope in experiment set 1 at the end of 4 weeks for: **a)** biofilm (cells) on slides  
 15 in the middle section of the channel; **b)** EPS only on slides in the middle section of the channel; **c)** biofilm  
 16 on paper through which samples of the channel effluent was filtered; **d)** EPS only on paper through which  
 17 samples of the channel effluent was filtered.

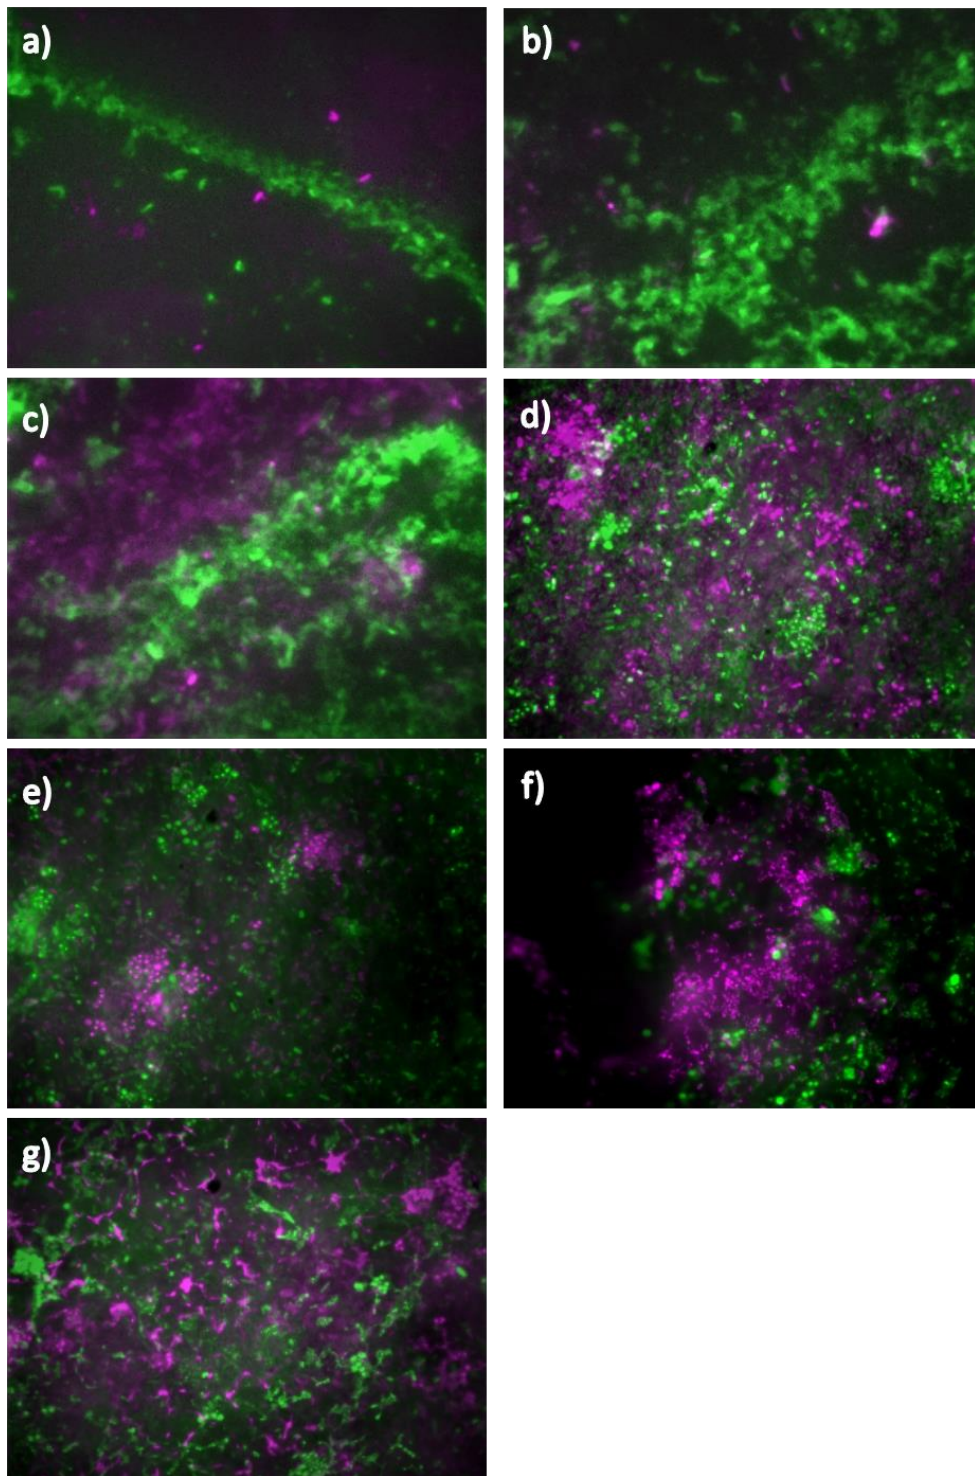

18

19 **Supplementary Figure 4.** Example images of the biofilm (EPS green and cells purple) from EVOS FL  
20 Auto 2 cell imaging system using a 100X oil immersion objective lens. They were selected at random  
21 from the images collected from slides on the middle section of the channel walls for a range of different  
22 flow regimes: **a)** Steady Flow (SF), channel 4, experiment 1; **b)** Small Vortex Flow (SVF), channel 9,

23 experiment 1; **c)** Large Vortex Flow (LVF), channel 1, experiment 1; **d)** LVF, channel 3 , experiment 1;  
 24 **e)** High Shear Flow 1 (HSF1), channel 5 experiment 2; **f)** HSF, Channel 7, experiment 2; **g)** Oscillating  
 25 Flow (OF), channel 11, experiment 2.

26

| Temperature (°C)                 | week 1     | week 2     | week 3     | week 4     |
|----------------------------------|------------|------------|------------|------------|
| <b>First set of experiments</b>  |            |            |            |            |
| tap water                        | 18.3 ± 0.5 | 17.7 ± 0.2 | 17.2 ± 0.5 | 17.1 ± 0.3 |
| air                              | 21.4 ± 0.3 | 20.8 ± 0.2 | 20.7 ± 0.1 | 20.8 ± 0.3 |
| <b>Second set of experiments</b> |            |            |            |            |
| tap water                        | 18.4 ± 0.3 | 18.3 ± 0.2 | 17.9 ± 0.2 | 17.1 ± 0.3 |
| air                              | 21.6 ± 0.4 | 21.2 ± 0.3 | 20.6 ± 0.3 | 19.8 ± 0.3 |

27

28 **Supplementary Table 1.** Temperature of tap water and of air (°C) at all duration of experiments.

29

|                                  | Wet mass of biofilm (mg) | Dry mass of biofilm (mg) |
|----------------------------------|--------------------------|--------------------------|
| <b>First set of experiments</b>  |                          |                          |
| Steady flow (SF)                 | 31.6                     | 22.2                     |
| Small Vortex Flow (SVF)          | 62.1                     | 36.8                     |
| Large Vortex Flow (LVF)          | 94.2                     | 48.9                     |
| <b>Second set of experiments</b> |                          |                          |
| Large Vortex Flow (LVF)          | 106.8                    | 66.5                     |
| High Shear Flow 1 (HSF1)         | 64.5                     | 52.4                     |
| High Shear Flow 2 (HSF2)         | 54.9                     | 34.8                     |
| Oscillating Flow (OF)            | 86                       | 49.8                     |

30

31 **Supplementary Table 2.** The wet and dry mass of the biofilm (mg) in the first and second set of  
 32 experiments.
